# Supplementary material
Source: MDPI journal article supplement (https://www.mdpi.com/2225-1154/11/12/243)
Supplement: s1 [file s1]

## Supplementary Information (SI)

for

### Linking Climate Change information with Crop Growing Seasons in the Northwest Ethiopian Highlands

Gashaw Bimrew Tarekegn <sup>1</sup>, Addis A. Alaminie <sup>2</sup> and Sisay E. Debele <sup>3\*</sup>

<sup>1</sup> Institute of Disaster Risk Management and Food security Studies, Bahir Dar University, Bahir Dar; Post P.O.Box: 5501, Ethiopia; gashbimrew@gmail.com

<sup>2</sup> Faculty of Civil and Water Resources Engineering, Bahir Dar University, P.O.Box: 400, Ethiopia ; metaddi@gmail.com

<sup>3</sup> Global Centre for Clean Air Research (GCARE), School of Sustainability, Civil and Environmental Engineering, Faculty of Engineering and Physical Sciences, University of Surrey, Guildford GU2 7XH, UK

\* Correspondence: sd0059@surrey.ac.uk.

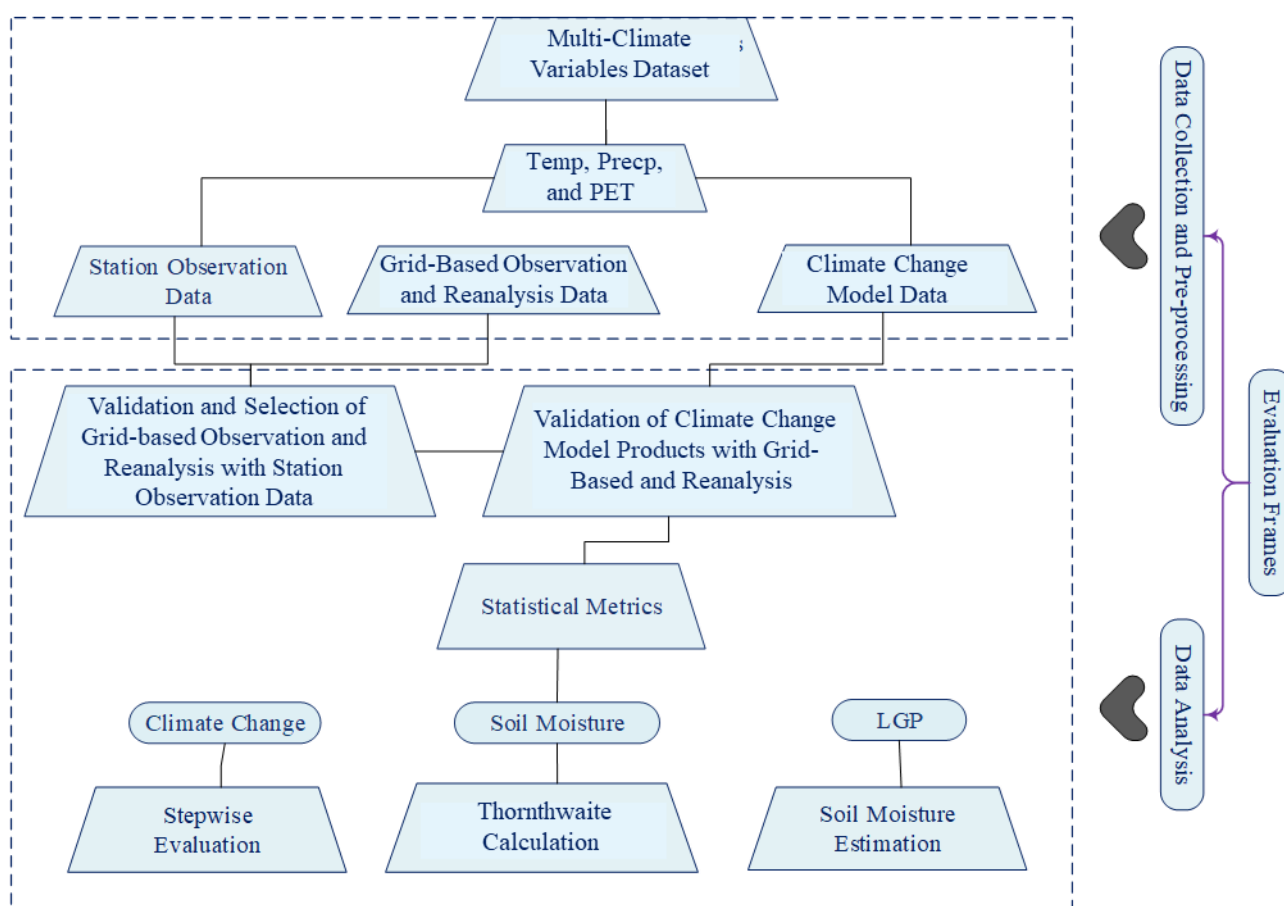

**Figure S1.** Flow chart illustrating how the research steps are interlinked.

**Table S1.** Runoff coefficient: empirical coefficient representing fraction of rainfall that runs off (adapted from McBean et al., 1995).

| Runoff coefficients for landfill        |                    |
|-----------------------------------------|--------------------|
| Surface Conditions: Grass cover (slope) | Runoff Coefficient |

|                           |             |
|---------------------------|-------------|
| Sandy soil, flat, 2%      | 0.05 - 0.10 |
| Sandy soil, steep, 7%     | 0.10 - 0.15 |
| Heavy soil, flat, 2%      | 0.15 - 0.20 |
| Heavy soil, average, 2-7% | 0.13 - 0.17 |
| Heavy soil, steep, 7%     | 0.18 - 0.22 |
| Sandy soil, average, 2-7% | 0.25 - 0.35 |

**Table S2.** Summary of research methods used in this study.

| No | Activity                                                                                           | Methods applied                                                                                                                                                                                                                                                                                                                                                                                   | Climate variables required/ acquired                                                                                                                                           |
|----|----------------------------------------------------------------------------------------------------|---------------------------------------------------------------------------------------------------------------------------------------------------------------------------------------------------------------------------------------------------------------------------------------------------------------------------------------------------------------------------------------------------|--------------------------------------------------------------------------------------------------------------------------------------------------------------------------------|
| 1  | Data collection<br>Station data<br>Gridded observation and reanalysis data<br>Model-simulated data | Station area average P, Tasmax and PET in NW Ethiopian highlands<br>GPCC V6 (P) and CRU TS v3 (Tasmax) gridded observation data and reanalysis shf data from ERA-Interim and MERRA from Climate Explorer website (climexp.knmi.nl)<br>CMIP5 web page: <a href="http://climateactionnetwork.org/cmip5">http://climateactionnetwork.org/cmip5</a> or via Climate Explorer website (climexp.knmi.nl) | Maximum, minimum and mean temperature (Tasmax), Tasmin, temperature (Tasmin), precipitation (GPCC V6-precipitation), sensible and latent heat flux, soil water content and PET |
| 2  | Filling missing station data                                                                       | Arithmetic mean                                                                                                                                                                                                                                                                                                                                                                                   | Rainfall and temperature                                                                                                                                                       |
| 3  | Clustering in homogenous zones                                                                     | EOF analysis                                                                                                                                                                                                                                                                                                                                                                                      | GPCC V6-precipitation                                                                                                                                                          |
| 4  | Model development and validation                                                                   | Linear regression and stepwise evaluation                                                                                                                                                                                                                                                                                                                                                         | P, Tasmax, shf, lhf, and soil moisture                                                                                                                                         |
| 5  | Analysis of climate change,                                                                        | Statistical descriptors (mean, median, standard deviation, percentiles), linear trend                                                                                                                                                                                                                                                                                                             | Tasmax, Tasmin, temperature, onset, offset date and LGP, PET, and soil moisture                                                                                                |
| 6  | Trend test                                                                                         | Regression slope and significance test                                                                                                                                                                                                                                                                                                                                                            | Tasmax, Tasmin, temperature, LGP and PET                                                                                                                                       |
| 7  | Computing soil water balance (P-Es)                                                                | Subtraction PET of each month from the respective rainfall (P) each month                                                                                                                                                                                                                                                                                                                         | P and PET                                                                                                                                                                      |
| 8  | Calculating accumulated potential water loss (Acc. Pot. WL)                                        | Progressively adding (P-Es) values starting from the first negative value that occurs usually after rainy season                                                                                                                                                                                                                                                                                  | P-Es                                                                                                                                                                           |
| 9  | Converting Acc. Pot. WL to soil water storage or reserve (ST)                                      | Soil water retention tables prepared by Thornthwaite and Mather                                                                                                                                                                                                                                                                                                                                   | Acc. Pot. WL at 200mm field capacity and silty loam at 0.5 meter depth                                                                                                         |
| 10 | Computing soil water change ( $\Delta$ ST)                                                         | Reduce soil water content storage (ST) from the next month ST starting by taking December initial storage or reserve                                                                                                                                                                                                                                                                              | soil water content storage (ST) of annual cycle                                                                                                                                |
| 11 | Interpolating monthly data to daily data                                                           | Instat +v 3.36 software                                                                                                                                                                                                                                                                                                                                                                           | Monthly annual cycle soil water change                                                                                                                                         |

|    |                                                                               |                                                         |                                                  |
|----|-------------------------------------------------------------------------------|---------------------------------------------------------|--------------------------------------------------|
| 12 | Onset date, cessation, and LGP of past (1981-2010) and the future (2020-2070) | Instat + v3.36 software and Microsoft office Excel 2007 | $\Delta$ ST, Tasmax and Tasmin                   |
| 14 | Assessing impact of climate change length of growing season                   | CV, percentiles, correlation, standard dev.             | $\Delta$ ST, onset date, cessation date, and LGP |

#### Stepwise evaluation

The stepwise criteria used for the evaluation of the CMIP5 rcp6 model simulations compared with monthly observations in the NW Ethiopian highlands are described as follows (Jury, 2015):

- Firstly, the CRU3 TS v3.22 (tasmax) and GPCC V6 (P) interpolated observations were compared with local stations' tasmax, and rainfall averaged over the NW Ethiopian highland area respectively, and revealed good results (as described in sections 4.1.1 and 4.1.2 above). This step is critical for further evaluation (Schwalm et al., as cited by Jury, 2015).
- Next, the mean annual cycle of highland area-averaged tasmax and rainfall in CMIP5 rcp6 outputs was evaluated for intensity and distribution. Models that simulated bi-modal rainfall or had dry/wet bias were screened out; the remaining models had a uni-modal peak  $\approx 7$ mm/day in July-August.
- The spatial distribution of annual rain difference was compared with GPCC V6 precipitation (P) and CRU TSv3.22 (tasmax) for the period 1981-2010.
- To model the simulated annual cycle, correlations with GPCC V6 (P) and CRU TS3.22 (tasmax) were calculated, and  $r < 0.9$  was deemed unfit.
- In addition, seasonal JJAS (P) and MAM (tasmax) differences were calculated, and values ( $> \pm 1$  mm/day or  $> \pm 1^\circ\text{C}$ ) were screened out.
